# Supplementary material for: Genomic data assimilation using a higher moment filtering technique for restoration of gene regulatory networks
Source: Springer Nature journal article supplement (doi:10.1186/s12918-015-0154-2), 2015-03-12
Supplement: 12918_2015_154_MOESM1_ESM.pdf [file 12918_2015_154_MOESM1_ESM.pdf]

# Additional File 1

## The Standardizations Function Used for HMEEnPF

We consider a standardization function  $S(\boldsymbol{\gamma} = (\gamma_1, \dots, \gamma_p)', \boldsymbol{\alpha} = (\alpha_1, \dots, \alpha_p)', \boldsymbol{\beta} = (\beta_1, \dots, \beta_p)')$  that transforms a  $p$ -dimensional normal random vector  $\boldsymbol{\gamma}$  into a  $p$ -dimensional normalized random vector  $\boldsymbol{x} = (x_1, \dots, x_p)'$  where  $\boldsymbol{\alpha} = (E[(x_1 - E[x_1])^3], \dots, E[(x_p - E[x_p])^3])'$  and  $\boldsymbol{\beta} = (E[(x_1 - E[x_1])^4], \dots, E[(x_p - E[x_p])^4])'$ , respectively. From a previous study [1], we have  $S(\boldsymbol{\gamma}, \boldsymbol{\alpha}, \boldsymbol{\beta})$  and  $S_{inv}(\boldsymbol{x}, \boldsymbol{\alpha}, \boldsymbol{\beta})$  that transforms  $\boldsymbol{x}$  to  $\boldsymbol{\gamma}$ . These functions are described by

$$S(\boldsymbol{\gamma}, \boldsymbol{\alpha}, \boldsymbol{\beta}) = (s(\gamma_1, \alpha_1, \beta_1), \dots, s(\gamma_p, \alpha_p, \beta_p))', \quad (\text{S3-1})$$

$$s(\gamma, \alpha, \beta) = -l_1 + k_1\gamma + l_1\gamma^2 + k_2\gamma^3, \quad (\text{S3-2})$$

$$l_1 = \frac{\alpha}{6(1 + 6l_2)}, \quad (\text{S3-3})$$

$$l_2 = \frac{1}{36}(\sqrt{6\beta - 8\alpha^2 - 14} - 2), \quad (\text{S3-4})$$

$$k_1 = \frac{1 - 3l_2}{1 + l_1^2 - l_2^2}, \quad (\text{S3-5})$$

$$k_2 = \frac{l_2}{(1 + l_2^2 + 12l_2^2)}, \quad (\text{S3-6})$$

and

$$S_{inv}(\boldsymbol{x}, \boldsymbol{\alpha}, \boldsymbol{\beta}) = (s_{inv}(x_1, \alpha_1, \beta_1), \dots, s_{inv}(x_p, \alpha_p, \beta_p))', \quad (\text{S3-7})$$

$$s_{inv}(x, \alpha, \beta) = \frac{\sqrt[3]{2}p}{\sqrt[3]{-q + \delta}} + \frac{\sqrt[3]{-q + \delta}}{\sqrt[3]{2}} - \frac{l_1}{3k_2}, \quad (\text{S3-8})$$

$$\delta = \sqrt{q^2 + 4p^3}, \quad (\text{S3-9})$$

$$p = \frac{3k_1k_2 - l_1^2}{9k_2^2}, \quad (\text{S3-10})$$

$$q = \frac{2l_1^3 - 9k_1k_2l_1 + 27k_2^2(-l_1 - x)}{27k_2^3}. \quad (\text{S3-11})$$

## References

- [1] Zhao, Y., Lu, Z.: Fourth-moment standardization for structural reliability assessment. *Journal of Structural Engineering* **133**(7), 916–924 (2007)
