# Supplementary material for: Genomic data assimilation using a higher moment filtering technique for restoration of gene regulatory networks
Source: Springer Nature journal article supplement (doi:10.1186/s12918-015-0154-2), 2015-03-12
Supplement: 12918_2015_154_MOESM2_ESM.pdf [file 12918_2015_154_MOESM2_ESM.pdf]

## Additional File 2

### The smoothing step in HM-EnPF

Here, we assume  $\mathcal{T}_{obs} = \mathcal{T}$  for simplicity. The smoothing step also consists of the following three sub-steps. At  $t$ th ( $t \in \mathcal{T}_{obs}$ ) time step, for  $s = t + 1, \dots, T$ ,

#### 1. Particle Filter Step

- (a) Resample  $\hat{\mathbf{x}}_{t|s}^{(n)}$  according to

$$p(\mathbf{x}_t | \mathbf{Y}_s) = \frac{1}{\sum_{\hat{n}} p(\mathbf{y}_s | \mathbf{x}_{s|s-1}^{(\hat{n})})} \sum_{n=1}^N p(\mathbf{y}_s | \mathbf{x}_{s|s-1}^{(n)}) \delta(\mathbf{x}_t - \mathbf{x}_{t|s-1}^{(n)}), \quad (\text{S1-1})$$

where  $\delta(\cdot)$  is a Dirac delta function.

- (b) Calculate first and second moments  $\mu_{t|s} = E[\{\hat{\mathbf{x}}_{t|s}^{(n)}\}]$  and  $V_{t|s} = Var[\{\hat{\mathbf{x}}_{t|s}^{(n)}\}]$ , respectively.  
(c) Standardize  $\hat{\mathbf{x}}_{t|s}^{(n)}$  as

$$\hat{\mathbf{z}}_{t|s}^{(n)} = V_{t|s}^{-\frac{1}{2}} \cdot (\hat{\mathbf{x}}_{t|s}^{(n)} - \mu_{t|s}). \quad (\text{S1-2})$$

- (d) Calculate third and fourth central moments  $\hat{\mathbf{m}}_{t|s}^{(3)} = E[\{\hat{\mathbf{z}}_{t|s}^{(n)}\}^3]$  and  $\hat{\mathbf{m}}_{t|s}^{(4)} = E[\{\hat{\mathbf{z}}_{t|s}^{(n)}\}^4]$ , respectively.

#### 2. Ensemble Kalman Filter Step

- (a) Calculate Kalman gain

$$K_s = \frac{1}{N-1} \left\{ \sum_{n=1}^N (\mathbf{x}_{t|s-1}^{(n)} - E[\{\mathbf{x}_{t|s-1}^{(n)}\}]) (\mathbf{x}_{s|s-1}^{(n)} - E[\{\mathbf{x}_{s|s-1}^{(n)}\}])' (V_{s|s-1} + R_s)^{-1} \right\}. \quad (\text{S1-3})$$

- (b) Calculate  $\tilde{\mathbf{x}}_{t|s}^{(n)}$  as

$$\tilde{\mathbf{x}}_{t|s}^{(n)} = \mathbf{x}_{t|s-1}^{(n)} + K_s (\mathbf{y}_s - \mathbf{x}_{s|s-1}^{(n)} + \mathbf{w}_s^{(n)}). \quad (\text{S1-4})$$

- (c) Calculate first and second moments  $\tilde{\mu}_{t|s} = E[\{\tilde{\mathbf{x}}_{t|s}^{(n)}\}]$  and  $\tilde{V}_{t|s} = Var[\{\tilde{\mathbf{x}}_{t|s}^{(n)}\}]$ , respectively.

- (d) Standardize  $\tilde{\mathbf{x}}_{t|s}^{(n)}$  as

$$\tilde{\mathbf{z}}_{t|s}^{(n)} = \tilde{V}_{t|s}^{-\frac{1}{2}} \cdot (\tilde{\mathbf{x}}_{t|s}^{(n)} - \tilde{\mu}_{t|s}). \quad (\text{S1-5})$$

- (e) Calculate third and fourth central moments  $\tilde{\mathbf{m}}_{t|s}^{(3)} = E[\{\tilde{\mathbf{z}}_{t|s}^{(n)}\}^3]$  and  $\tilde{\mathbf{m}}_{t|s}^{(4)} = E[\{\tilde{\mathbf{z}}_{t|s}^{(n)}\}^4]$ , respectively.

#### 3. Merging Step

Calculate  $\mathbf{x}_{t|s}^{(n)}$  as

$$\mathbf{x}_{t|s}^{(n)} = \hat{V}_{t|s}^{\frac{1}{2}} S(\mathbf{z}_t^{(n)}, \hat{\mathbf{m}}_{t|s}^{(3)}, \hat{\mathbf{m}}_{t|s}^{(4)}) + \hat{\mu}_{t|s}, \quad (\text{S1-6})$$

$$\mathbf{z}_t^{(n)} = S(\tilde{\mathbf{z}}_{t|s}^{(n)}, \tilde{\mathbf{m}}_{t|s}^{(3)}, \tilde{\mathbf{m}}_{t|s}^{(4)})^{-1}. \quad (\text{S1-7})$$
