# Supplementary material for: Genomic data assimilation using a higher moment filtering technique for restoration of gene regulatory networks
Source: Springer Nature journal article supplement (doi:10.1186/s12918-015-0154-2), 2015-03-12
Supplement: 12918_2015_154_MOESM3_ESM.pdf [file 12918_2015_154_MOESM3_ESM.pdf]

## Additional File 3

### EM-algorithm for a state space representation of the combinatorial effect model

In the Expectation-step,  $q(\boldsymbol{\theta}|\boldsymbol{\theta}_l)$  is calculated by

$$\begin{aligned}
q(\boldsymbol{\theta}|\boldsymbol{\theta}_l) &= -\frac{1}{2}\text{tr}\{V_{0|0}^{-1}(V_{0|t} + (\mathbf{x}_{0|t} - \boldsymbol{\mu}_0)(\mathbf{x}_{0|t} - \boldsymbol{\mu}_0)')\} - \frac{1}{2}\log|\Sigma_{0|t}| \\
&\quad - \frac{1}{2}\sum_{t=1}^T \text{tr}\{Q^{-1}E[(\mathbf{x}_t - F\mathbf{x}_{t-1} - B\text{vec}(\mathbf{x}_{t-1}\mathbf{x}'_{t-1}) - G\mathbf{d}_{t-1} - \mathbf{u}) \\
&\quad \cdot (\mathbf{x}_t - F\mathbf{x}_{t-1} - B\text{vec}(\mathbf{x}_{t-1}\mathbf{x}'_{t-1}) - G\mathbf{d}_{t-1} - \mathbf{u})'|Y_T]\} \\
&\quad - \frac{T}{2}\log|Q| - \frac{1}{2}\text{tr}\{R^{-1}\sum_{t=1}^T\{(\mathbf{y}_t - \mathbf{x}_{t|t})(\mathbf{y}_t - \mathbf{x}_{t|t})' + V'_{t|t}\}\} - \frac{T}{2}\log|R| - N(T + \frac{1}{2})\log 2\pi. \tag{S2-1}
\end{aligned}$$

In the Maximization-step,  $\boldsymbol{\theta}_l$  is updated to  $\boldsymbol{\theta}_{l+1} = \arg \max_{\boldsymbol{\theta}} q(\boldsymbol{\theta}|\boldsymbol{\theta}_l)$ . At first, set conditional expectations of  $\mathbf{x}_t$  as

$$V_t = \frac{1}{N} \sum_{t \in \mathcal{T}} \sum_{n=1}^N \mathbf{x}_{t|T}^{(n)} \mathbf{x}_{t|T}^{(n)'} \tag{S2-2}$$

$$V_{lag} = \frac{1}{N} \sum_{t \in \mathcal{T}} \sum_{n=1}^N \mathbf{x}_{t|T}^{(n)} \mathbf{x}_{t-1|T}^{(n)'}, \tag{S2-3}$$

$$V_{t-1} = \frac{1}{N} \sum_{t \in \mathcal{T}} \sum_{n=1}^N \mathbf{x}_{t-1|T}^{(n)} \mathbf{x}_{t-1|T}^{(n)'}, \tag{S2-4}$$

$$\Phi_{lag} = \frac{1}{N} \sum_{t \in \mathcal{T}} \sum_{n=1}^N \mathbf{x}_{t|T}^{(n)} \text{vec}(\mathbf{x}_{t-1|T}^{(n)} \mathbf{x}_{t-1|T}^{(n)'})', \tag{S2-5}$$

$$\Phi_{t-1} = \frac{1}{N} \sum_{t \in \mathcal{T}} \sum_{n=1}^N \mathbf{x}_{t-1|T}^{(n)} \text{vec}(\mathbf{x}_{t-1|T}^{(n)} \mathbf{x}_{t-1|T}^{(n)'})', \tag{S2-6}$$

$$\Psi_{t-1} = \frac{1}{N} \sum_{t \in \mathcal{T}} \sum_{n=1}^N \text{vec}(\mathbf{x}_{t-1|T}^{(n)} \mathbf{x}_{t-1|T}^{(n)'}) \text{vec}(\mathbf{x}_{t-1|T}^{(n)} \mathbf{x}_{t-1|T}^{(n)'})', \tag{S2-7}$$

$$E_{lag} = \frac{1}{N} \sum_{t \in \mathcal{T}} \sum_{n=1}^N \mathbf{x}_{t|T}^{(n)} \mathbf{d}'_{t-1}, \tag{S2-8}$$

$$E_{t-1} = \frac{1}{N} \sum_{t \in \mathcal{T}} \sum_{n=1}^N \mathbf{x}_{t-1|T}^{(n)} \mathbf{d}'_{t-1}, \tag{S2-9}$$

$$E_{t-1}^2 = \frac{1}{N} \sum_{t \in \mathcal{T}} \sum_{n=1}^N \text{vec}(\mathbf{x}_{t-1|T}^{(n)} \mathbf{x}_{t-1|T}^{(n)'}) \mathbf{d}'_{t-1}, \tag{S2-10}$$

$$\mathbf{z} = \sum_{t \in \mathcal{T}} \mathbf{d}_{t-1}, \quad (\text{S2-11})$$

$$\mathbf{Z} = \sum_{t \in \mathcal{T}} \mathbf{d}_{t-1} \mathbf{d}'_{t-1}. \quad (\text{S2-12})$$

$$\mathbf{s}_t = \frac{1}{N} \sum_{t \in \mathcal{T}} \sum_{n=1}^N \mathbf{x}_{t|T}^{(n)}, \quad (\text{S2-13})$$

$$\mathbf{s}_{t-1} = \frac{1}{N} \sum_{t \in \mathcal{T}} \sum_{n=1}^N \mathbf{x}_{t-1|T}^{(n)}, \quad (\text{S2-14})$$

$$\mathbf{s}_{t-1}^2 = \frac{1}{N} \sum_{t \in \mathcal{T}} \sum_{n=1}^N \text{vec}(\mathbf{x}_{t-1|T}^{(n)} \mathbf{x}_{t-1|T}^{(n)'}). \quad (\text{S2-15})$$

Let  $\mathbf{v}_{lag,i}$ ,  $\phi_{lag,i}$  and  $\phi_{t-1,i}$  be a transpose of the  $i$ th row vector of  $V_{lag}$ ,  $\Phi_{lag}$  and  $\Phi_{t-1}$ , respectively. Then,  $\boldsymbol{\theta}$  is updated as

$$\mathbf{a}_i^{\mathcal{A}_i} = V_{t-1}^{\mathcal{A}_i^{-1}} (\mathbf{v}_{lag,i}^{\mathcal{A}_i} - \phi_{t-1}^{\mathcal{A}_i \times \mathcal{B}_i} \mathbf{b}_i^{\mathcal{B}_i} - E_{t-1}^{\mathcal{A}_i \times \mathcal{G}_i} \mathbf{g}_i^{\mathcal{G}_i} - u_i \mathbf{s}_{t-1}^{\mathcal{A}_i}), \quad (\text{S2-16})$$

$$\mathbf{b}_i^{\mathcal{B}_i} = \Psi_{t-1}^{\mathcal{B}_i^{-1}} (\phi_{lag,i}^{\mathcal{B}_i} - \phi_{t-1}^{\mathcal{A}_i \times \mathcal{B}_i'} \mathbf{a}_i^{\mathcal{A}_i} - E_{t-1}^{2^{\mathcal{B}_i} \times \mathcal{G}_i} \mathbf{g}_i^{\mathcal{G}_i} - u_i \mathbf{s}_{t-1}^{2^{\mathcal{B}_i}}), \quad (\text{S2-17})$$

$$\mathbf{g}_i^{\mathcal{G}_i} = Z^{\mathcal{G}_i^{-1}} (e_{lag,n}^{\mathcal{G}_i} - E_{t-1}^{\mathcal{A}_i \times \mathcal{G}_i'} \mathbf{a}_n^{\mathcal{A}_i} - E_{t-1}^{2^{\mathcal{B}_i} \times \mathcal{G}_i'} \mathbf{b}_i^{\mathcal{B}_i} - u_n \mathbf{z}^{\mathcal{G}_i}) \quad (\text{S2-18})$$

$$\mathbf{u} = \frac{\mathbf{s}_t - \mathbf{A} \mathbf{s}_{t-1} - \mathbf{B} \mathbf{s}_{t-1}^2 - \mathbf{G} \mathbf{z}}{T}, \quad (\text{S2-19})$$

$$Q = \frac{1}{T} \sum_{t=1}^T E[(\mathbf{x}_t - \mathbf{A} \mathbf{x}_{t-1} - \mathbf{B} \text{vec}(\mathbf{x}_{t-1} \mathbf{x}'_{t-1}) - \mathbf{G} \mathbf{d}_{t-1} - \mathbf{u}) \cdot (\mathbf{x}_t - \mathbf{A} \mathbf{x}_{t-1} - \mathbf{B} \text{vec}(\mathbf{x}_{t-1} \mathbf{x}'_{t-1}) - \mathbf{G} \mathbf{d}_{t-1} - \mathbf{u})' | Y_T], \quad (\text{S2-20})$$

$$\boldsymbol{\mu}_0 = \mathbf{x}_{0|T}, \quad (\text{S2-21})$$

$$R = \frac{1}{T} \sum_{t \in \mathcal{T}_{obs}} \{(\mathbf{y}_t - \mathbf{x}_{t|t})(\mathbf{y}_t - \mathbf{x}_{t|t})' + V_{t|t}\}, \quad (\text{S2-22})$$

where  $\mathcal{A}$ ,  $\mathcal{B}$  and  $\mathcal{G}$  are active sets of elements for  $A$ ,  $B$  and  $G$ , respectively. For example,  $\mathbf{a}_i^{\mathcal{A}}$  is an  $|\mathcal{A}|$ -dimensional vector consisting of elements regulating the  $i$ th gene.
