# Supplementary material for: Genomic data assimilation using a higher moment filtering technique for restoration of gene regulatory networks
Source: Springer Nature journal article supplement (doi:10.1186/s12918-015-0154-2), 2015-03-12
Supplement: 12918_2015_154_MOESM6_ESM.pdf [file 12918_2015_154_MOESM6_ESM.pdf]

## Additional File 6

### Corticosteroid Pharmacokinetics/dynamics

Because corticosteroid pharmacokinetics/dynamics in skeletal muscle have been modeled based on differential equations by Yao *et al.* (2008) as shown in Fig. ??, the time-dependent concentration of corticosteroid in nucleus in rat skeletal muscle can be obtained as followings;

$$\frac{dmRNA_R(t)}{dt} = k_{s\_Rm} \cdot \left\{ 1 - \frac{DR_N(t)}{IC_{50\_Rm} + DR_N(t)} \right\} - k_{d\_Rm} \cdot mRNA_R(t), \quad (S3-1)$$

$$\frac{dR(t)}{dt} = k_{s\_R} \cdot mRNA_R(t) + R_f \cdot k_{re} \cdot DR_N(t) - k_{on} \cdot D(t) \cdot R(t) - k_{d\_R} \cdot R(t), \quad (S3-2)$$

$$\frac{dDR(t)}{dt} = k_{on} \cdot D(t) \cdot R(t) - k_T \cdot DR(t), \quad (S3-3)$$

$$\frac{dDR_N(t)}{dt} = k_T \cdot DR(t) - k_{re} \cdot DR_N(t), \quad (S3-4)$$

where  $mRNA_R(t)$  is the concentration of mRNA of the receptor protein,  $R(t)$  is the concentration of the receptor protein,  $DR(t)$  is the concentration of the drug-receptor complex,  $DR_N(t)$  is the concentration of the drug-receptor complex in nucleus, and *Synthesis* and *Degradation* mean synthesis and degradation processes, respectively.  $DR_N(t)$  was used for  $d_t$ . These parameter values,  $k_{s\_Rm}$ ,  $IC_{50\_Rm}$ ,  $k_{d\_Rm}$ ,  $k_{s\_R}$ ,  $k_{d\_R}$ ,  $R_f$ ,  $k_{re}$ ,  $k_{on}$ ,  $k_{d\_R}$ ,  $k_T$ , are shown in Table 1. According to Sun *et al.* (1998), the time-evolution of the plasma concentration of corticosteroid is given as

$$D(t) = 39,130 \cdot e^{-7.54t} + 12,670 \cdot e^{-1.20t}. \quad (S3-5)$$

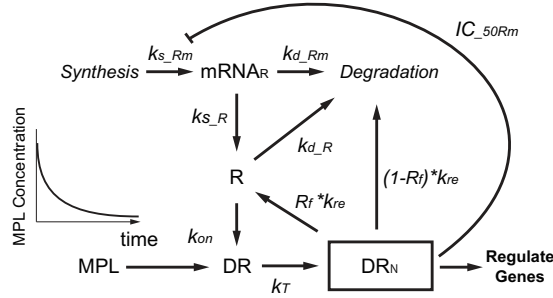

Figure 1: Corticosteroid Pharmacokinetics/dynamics in rat skeletal muscle. The pharmacokinetics/dynamics developed by Yao *et al.* (2008). The dynamics behavior of the concentration of biomolecules is described by differential equations.  $mRNA_R$  is the concentration of mRNA of the receptor protein,  $R$  is the concentration of the receptor protein,  $DR$  is the concentration of the drug-receptor complex,  $DR_N$  is the concentration of the drug-receptor complex in nucleus, and *Synthesis* and *Degradation* mean synthesis and degradation processes, respectively.

Table 1: The values of the parameters for corticosteroid pharmacodynamics illustrated in Fig. ??.

| parameter              | value   |
|------------------------|---------|
| $k_{s\_Rm}$ (fmol/g/h) | 0.416   |
| $k_{d\_Rm}$ (1/h)      | 0.139   |
| $k_{s\_R}$ (fmol/g/h)  | 0.777   |
| $k_{d\_R}$ (1/h)       | 0.0356  |
| $k_{on}$ (1/nmol/h)    | 0.00269 |
| $k_T$ (1/T)            | 90      |
| $k_{re}$ (1/h)         | 0.618   |
| $R_f$                  | 0.720   |
| $IC_{.50Rm}$ (fmol/mg) | 0.911   |
| $GR_{mRNA}^0$ (fmol/g) | 2.99    |
| $GR^0$ (fmol/mg)       | 65.3    |
